# Supplementary material for: Chemokine profiles of interstitial pneumonia in patients with dermatomyositis: a case control study
Source: PubMed Central journal article supplement (PMC5431618; doi:10.1038/s41598-017-01685-5), 2017-05-09
Supplement: 41598_2017_1685_MOESM1_ESM.pdf [file 41598_2017_1685_MOESM1_ESM.pdf]

Supplementary Information for:

**Chemokine profiles of interstitial pneumonia in patients with dermatomyositis: a case control study**

Katsuhiko Oda, MD<sup>1</sup>, Takuya Kotani, MD, PhD<sup>1</sup>, Tohru Takeuchi, MD, PhD<sup>1</sup>, Takaaki Ishida, MD<sup>1</sup>, Takeshi Shoda, MD<sup>1</sup>, Kentaro Isoda, MD, PhD<sup>1</sup>, Shuzo Yoshida, MD, PhD<sup>1</sup>, Yasuichiro Nishimura, PhD<sup>2</sup>, and Shigeki Makino, MD, PhD<sup>1</sup>

<sup>1</sup>Department of Internal Medicine (I), Osaka Medical College, Takatsuki, Osaka, Japan

<sup>2</sup>Department of Mathematics, Osaka Medical College, Takatsuki, Osaka, Japan

Correspondence and reprint requests to: Takuya Kotani, MD, PhD,

Department of Internal Medicine (I), Osaka Medical College, Daigaku-Machi 2-7,  
Takatsuki, Osaka 569-8686, Japan

Tel.: +81-72-683-1221; Fax: +81-72-683-1801

E-mail: [in1242@osaka-med.ac.jp](mailto:in1242@osaka-med.ac.jp)

This supplement contains:

Supplementary Figure S1

**Supplementary Fig. S1. Comparison of the change ratio of chemokine levels initially and at 2 weeks after treatment.**

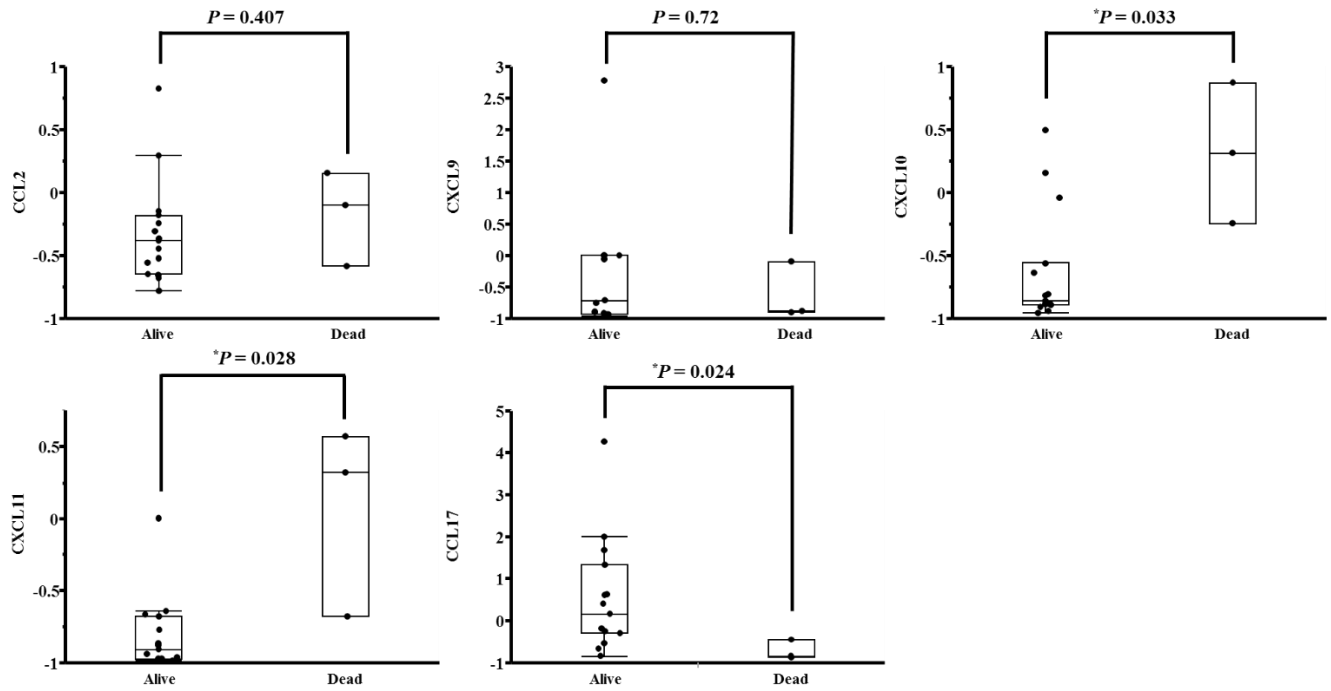

CCL: C-C motif chemokine ligand; CXCL: C-X-C motif chemokine ligand. The  $P$  value was estimated by the Mann-Whitney U-test. \* $P < 0.05$ .
